# Supplementary material
Source: PubMed Central journal article supplement (PMC4217685)

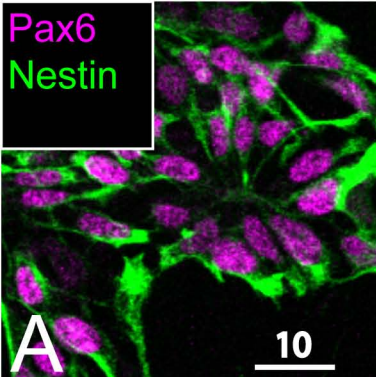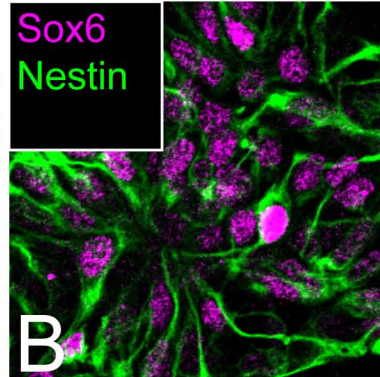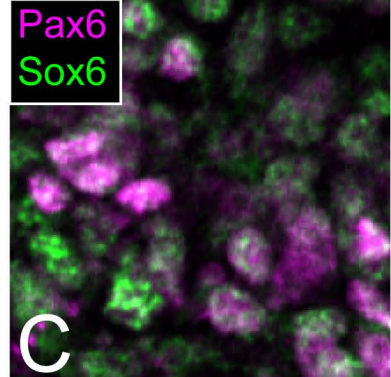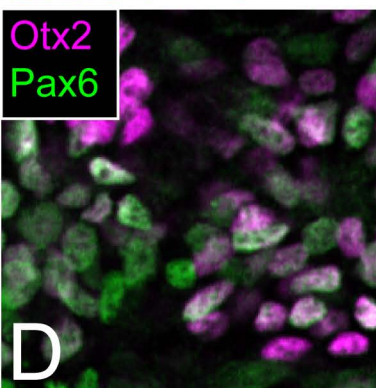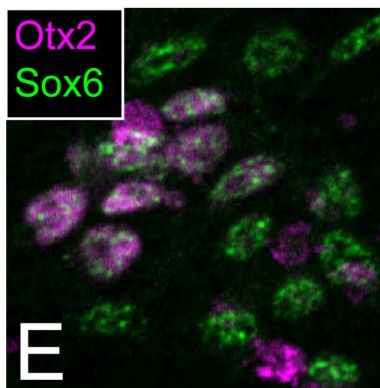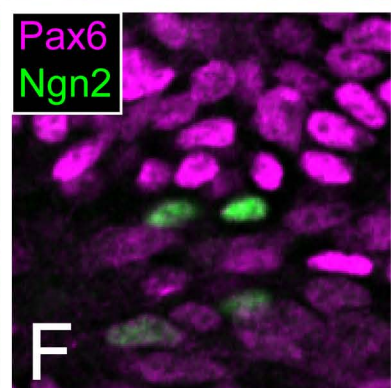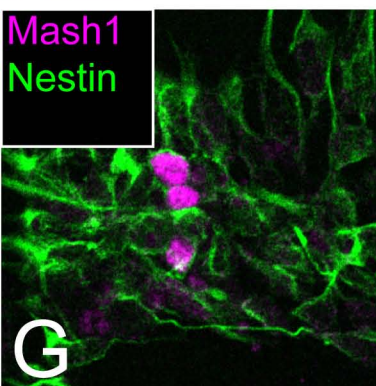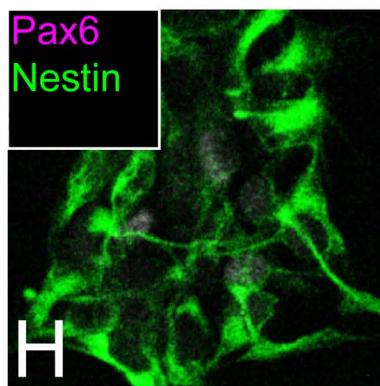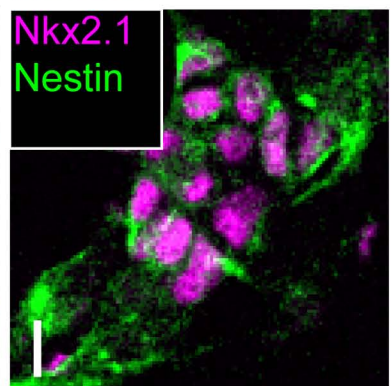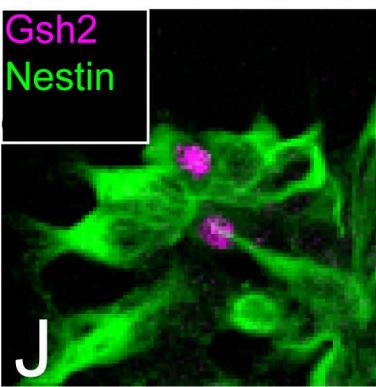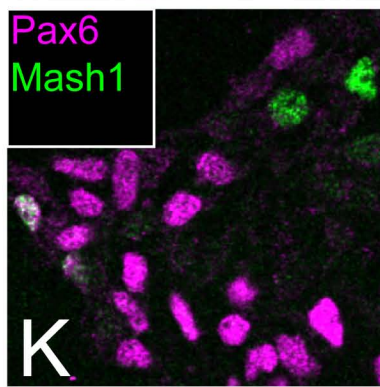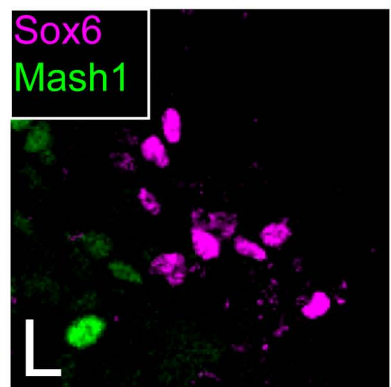

Supplement: NIHMS573589-supplement-Supp_FigureS2.pdf [file NIHMS573589-supplement-Supp_FigureS2.pdf]
